# Supplementary material for: The crystal structure and electrical/thermal transport properties of Li 1−x Sn 2+x P 2 and its performance as a Li-ion battery anode material
Source: Royal Society of Chemistry journal article supplement (doi:10.1039/d0ta11045k), 2021-01-01
Supplement: d0ta11045k1.pdf [file d0ta11045k1.pdf]

Electronic Supplementary Information

## Crystal structure and electrical/thermal transport properties of $\text{Li}_{1-x}\text{Sn}_{2+x}\text{P}_2$ and its performance as a Li-ion battery anode material

Yosuke Goto,<sup>\*a</sup> Shota Nakanishi,<sup>b</sup> Yusuke Nakai,<sup>b</sup> Takeshi Mito,<sup>b</sup> Akira Miura,<sup>c</sup> Chikako Moriyoshi,<sup>d</sup> Yoshihiro Kuroiwa,<sup>d</sup> Hidetomo Usui,<sup>e</sup> Tatsuma D. Matsuda,<sup>a</sup> Yuji Aoki,<sup>a</sup> Yoshifumi Nakacho,<sup>f</sup> Yuto Yamada,<sup>g</sup> Kiyoshi Kanamura,<sup>g</sup> Yoshikazu Mizuguchi<sup>a</sup>

<sup>a</sup>Department of Physics, Tokyo Metropolitan University, 1-1 Minami-osawa, Hachioji, Tokyo 192-0397, Japan

<sup>b</sup>Graduate School of Material Science, University of Hyogo, Ako 678-1297, Japan

<sup>c</sup>Faculty of Engineering, Hokkaido University, Kita 13, Nishi 8 Sapporo 060-8628, Japan

<sup>d</sup>Graduate School of Advanced Science and Engineering, Hiroshima University, 1-3-1 Kagamiyama, Higashihiroshima, Hiroshima 739-8526, Japan

<sup>e</sup>Department of Physics and Materials Science, Shimane University, Matsue, 690-8504, Japan

<sup>f</sup>MORESCO, Minatojima-minamimachi, Chuo, Kobe, Hyogo 650-0047, Japan

<sup>g</sup>Department of Applied Chemistry for Environment Graduate School of Urban Environmental Sciences, Tokyo Metropolitan University 1-1 Minami-Osawa, Hachioji, Tokyo 192-0397, Japan

Correspondence: [y\\_goto@tmu.ac.jp](mailto:y_goto@tmu.ac.jp)

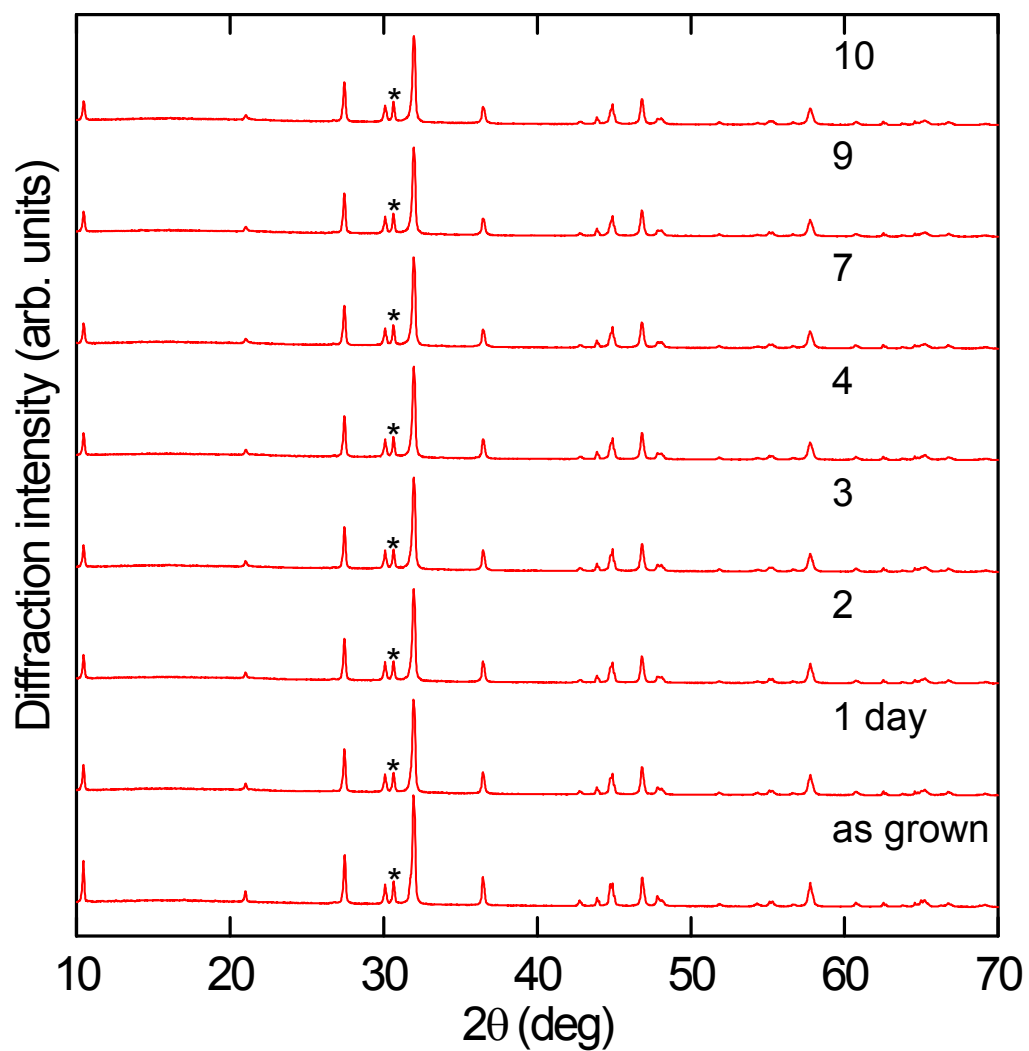

Figure S1

XRD patterns of  $\text{Li}_{1-x}\text{Sn}_{2+x}\text{P}_2$  exposed to air for 10 days without any visible signs of oxidation/hydrolysis. Asterisk denote the diffraction peak due to  $\text{Sn}_4\text{P}_3$ .

(a) Rhombohedral cell

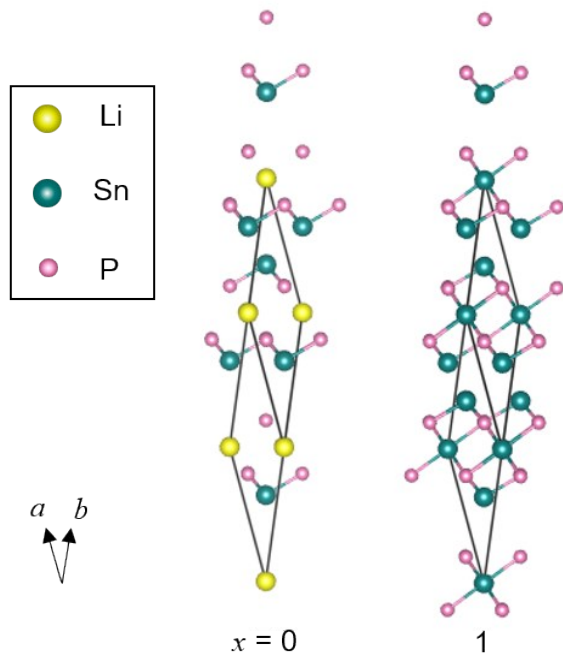

(b) Hexagonal cell

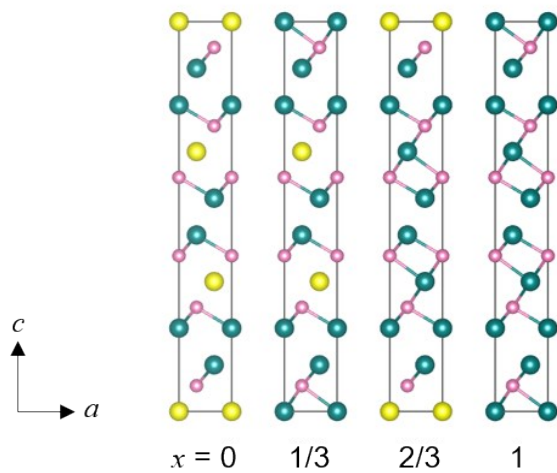

Figure S2

Crystal structures of  $\text{Li}_{1-x}\text{Sn}_{2+x}\text{P}_2$  used for first-principles calculations with (a) rhombohedral and (b) hexagonal cells.

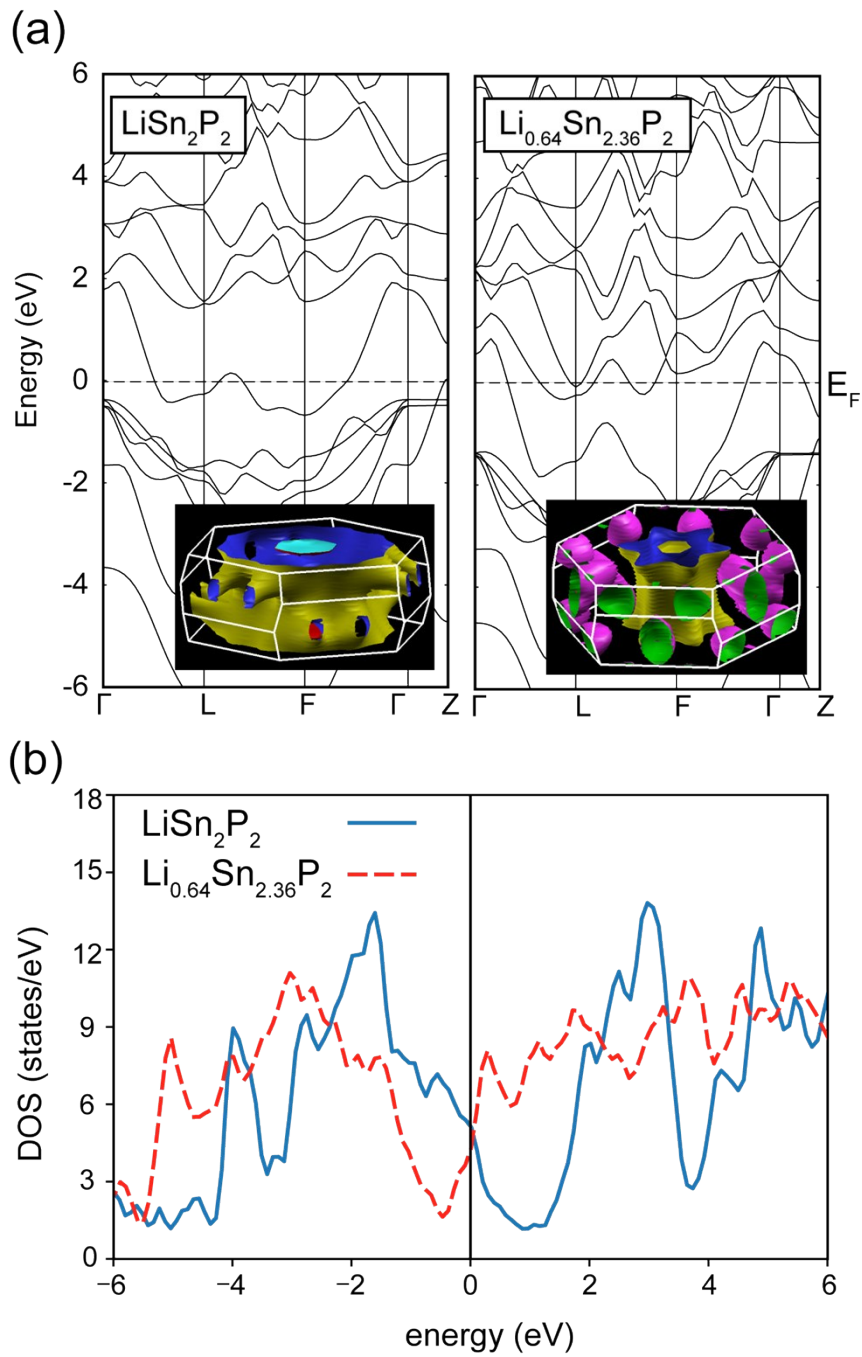

Figure S3

(a) The electronic band structure and the Fermi surface (inset), and (b) the density of states of  $\text{Li}_{1-x}\text{Sn}_{2+x}\text{P}_2$  calculated within the virtual crystal approximation.
